# Supplementary material
Source: publisher site journal article supplement (https://mbmg.pensoft.net/article/download/suppl/3681113/)

**Table S2.** Overview of the three sampling sites in Romania; the sampling sites L2 and Z2 are based on 10 kicknet sampling while site R2 it is based on 5 kicknet sampling due to the muddy substratum. The pictures below the table depict the sampling sites and were kindly provided by Dr. Karina Battes.

| <b>River Code</b> | <b>River Name</b> | <b>Date of sampling</b> | <b>Coordinates</b>        | <b>Altitude (m)</b> | <b>Ecological state (based on expert judgment)</b> |
|-------------------|-------------------|-------------------------|---------------------------|---------------------|----------------------------------------------------|
| Z2                | Călățele          | 24.06.2016              | N 46.74872,<br>E 23.00314 | 705                 | Good                                               |
| L2                | Almașul           | 24.06.2016              | N 46.93583,<br>E 22.94882 | 450                 | Mediocre to Good                                   |
| R2                | Valea Racilor     | 25.06.2016              | N 46.66156,<br>E 23.66503 | 528                 | Mediocre to Bad                                    |

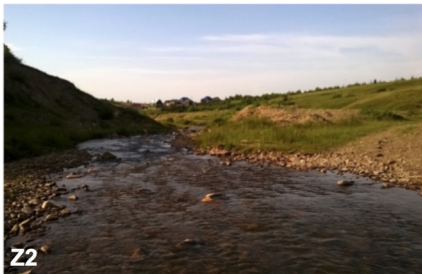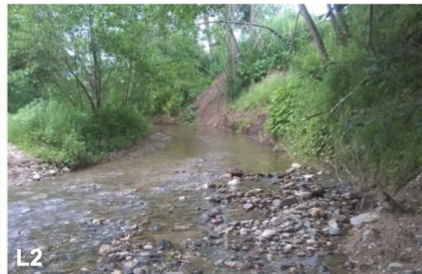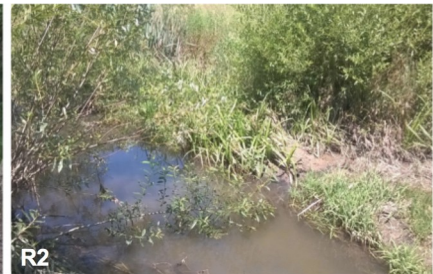

Supplement: Supplementary file 1
